# Supplementary material
Source: MDPI journal article supplement (https://www.mdpi.com/2078-2489/14/3/173)
Supplement: s1 [file s1]

Archive with 1 entries (1 files):
- information-2065387-supplementary.pdf
